# Supplementary material
Source: publisher site journal article supplement (https://www.dovepress.com/article/567974)
Supplement: Supplementary file 1 [file 567974%20Supplementary%20Material.docx]

**
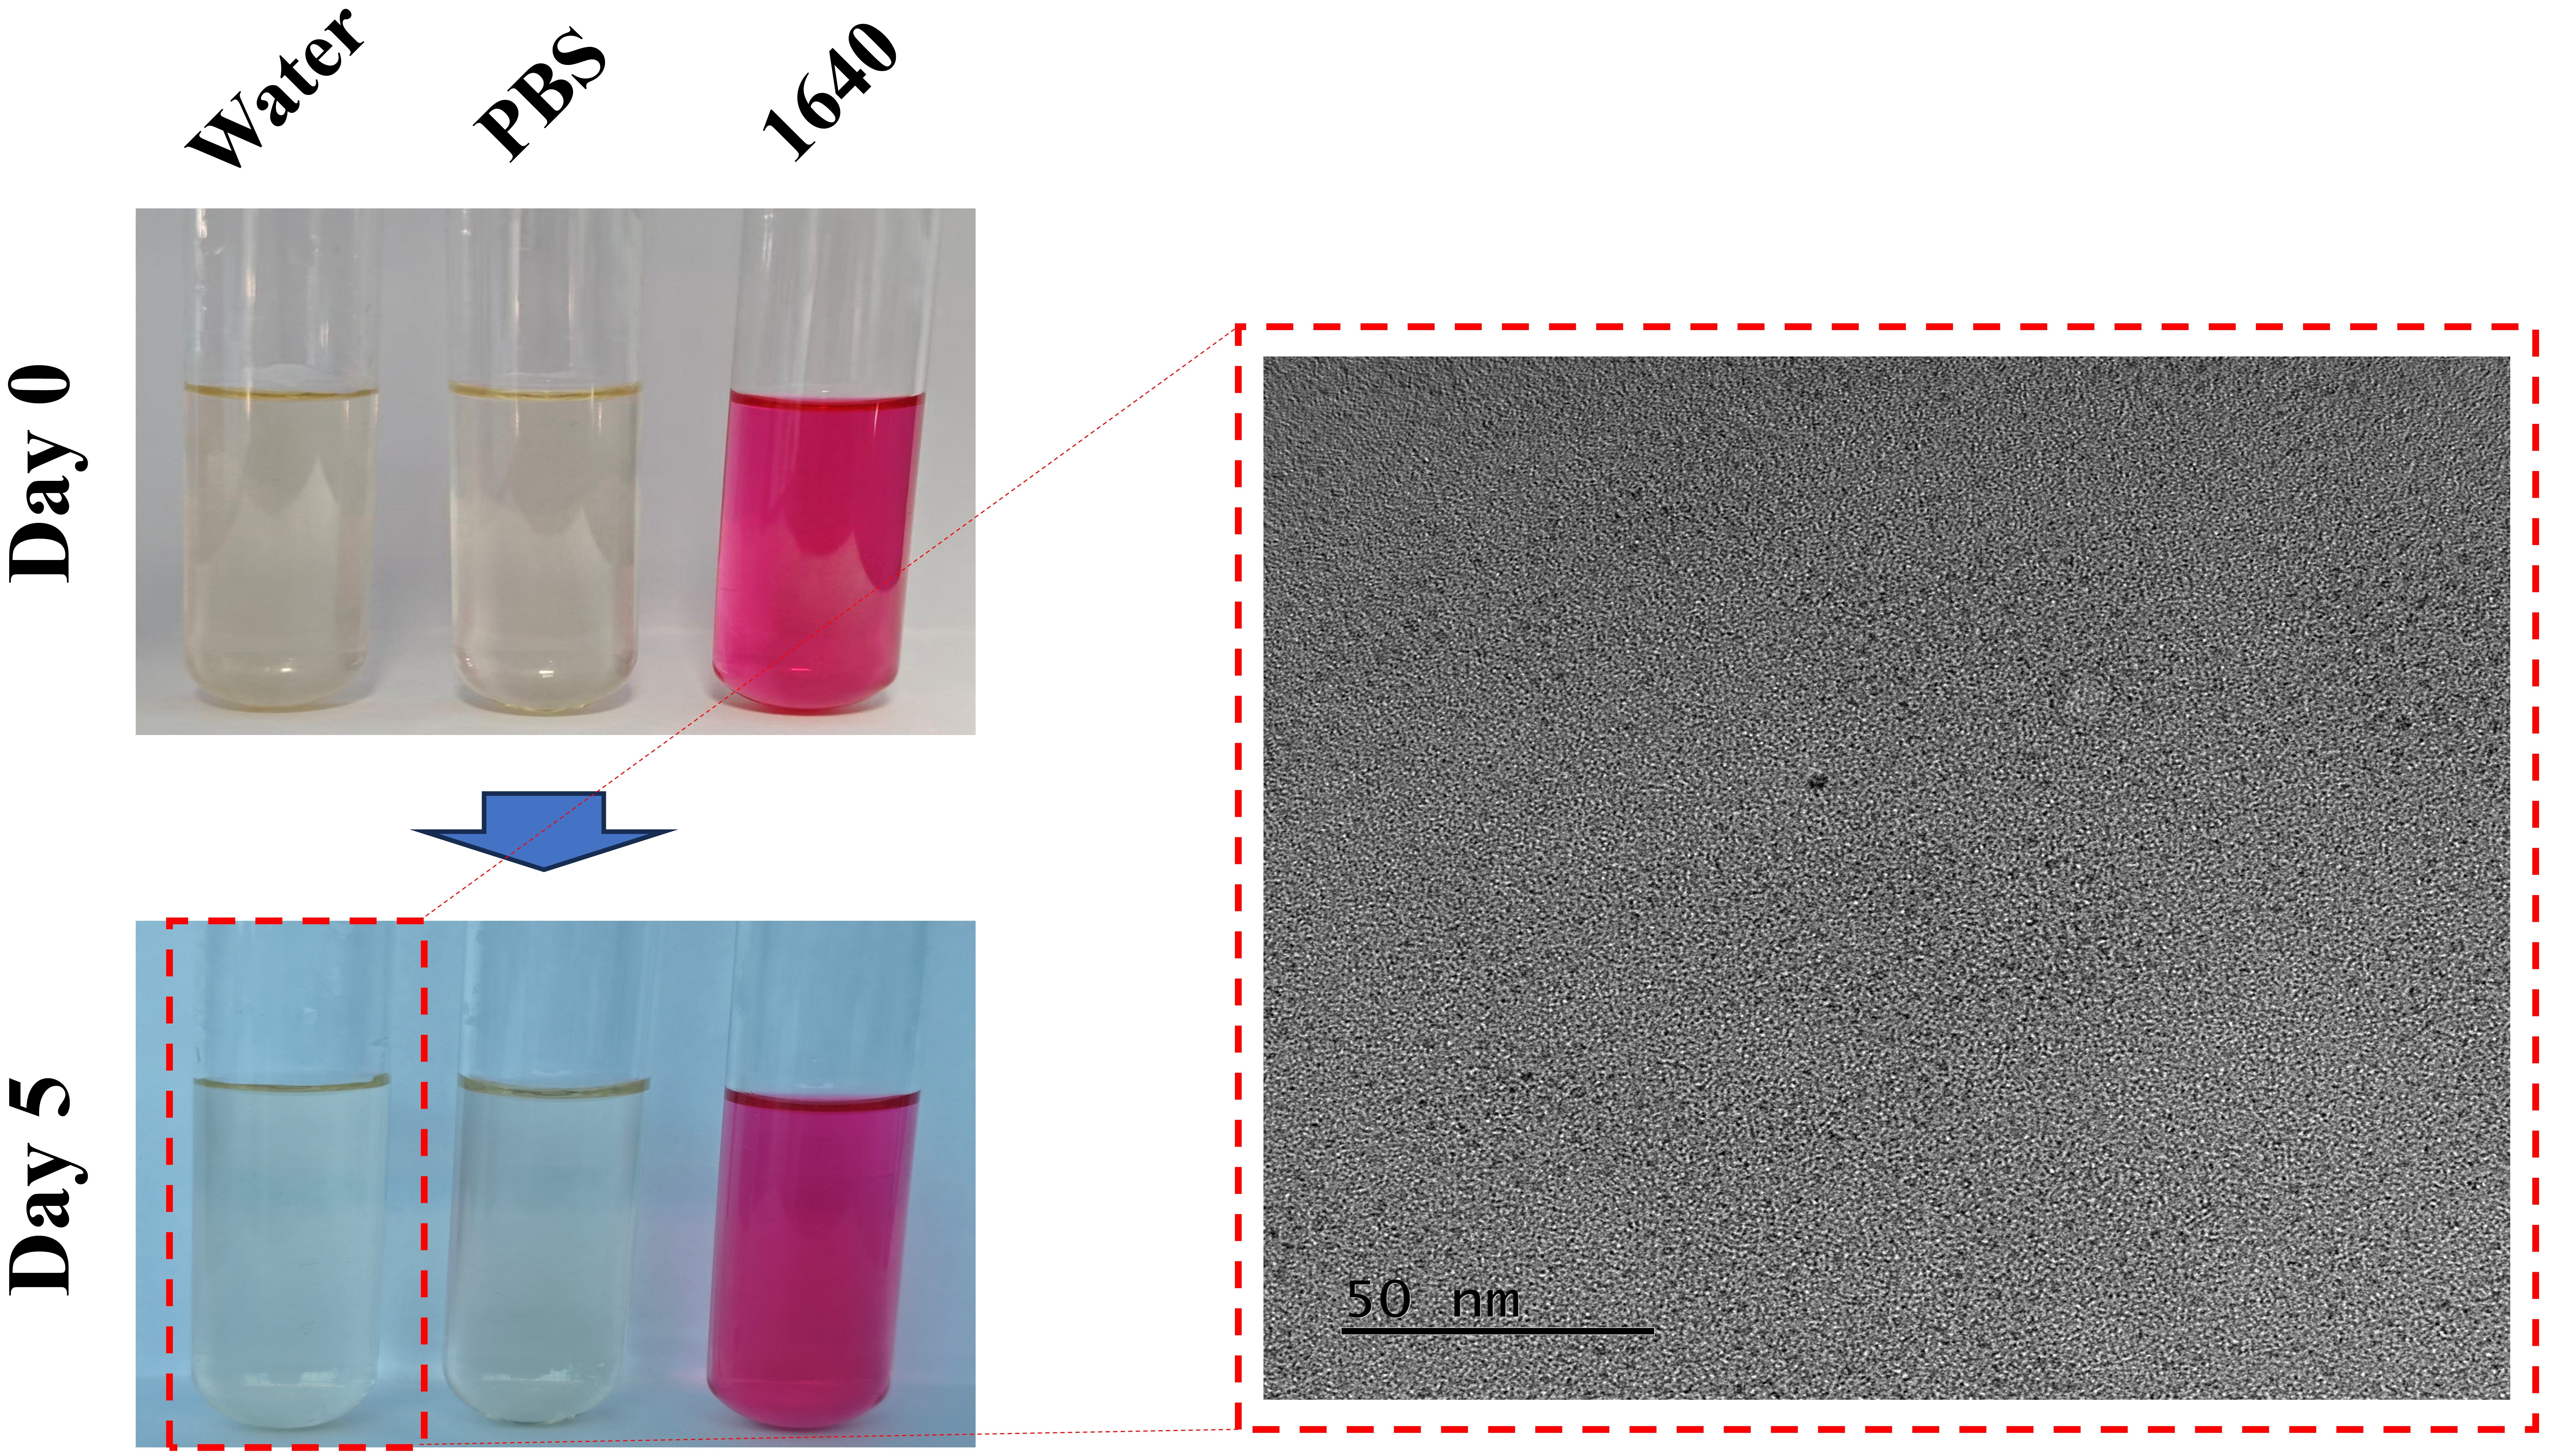
**

**Figure S1** Stability of PFCDs: Representative TEM image of PFCDs in deionized water after 5 days of storage (scale bar: 50 nm).


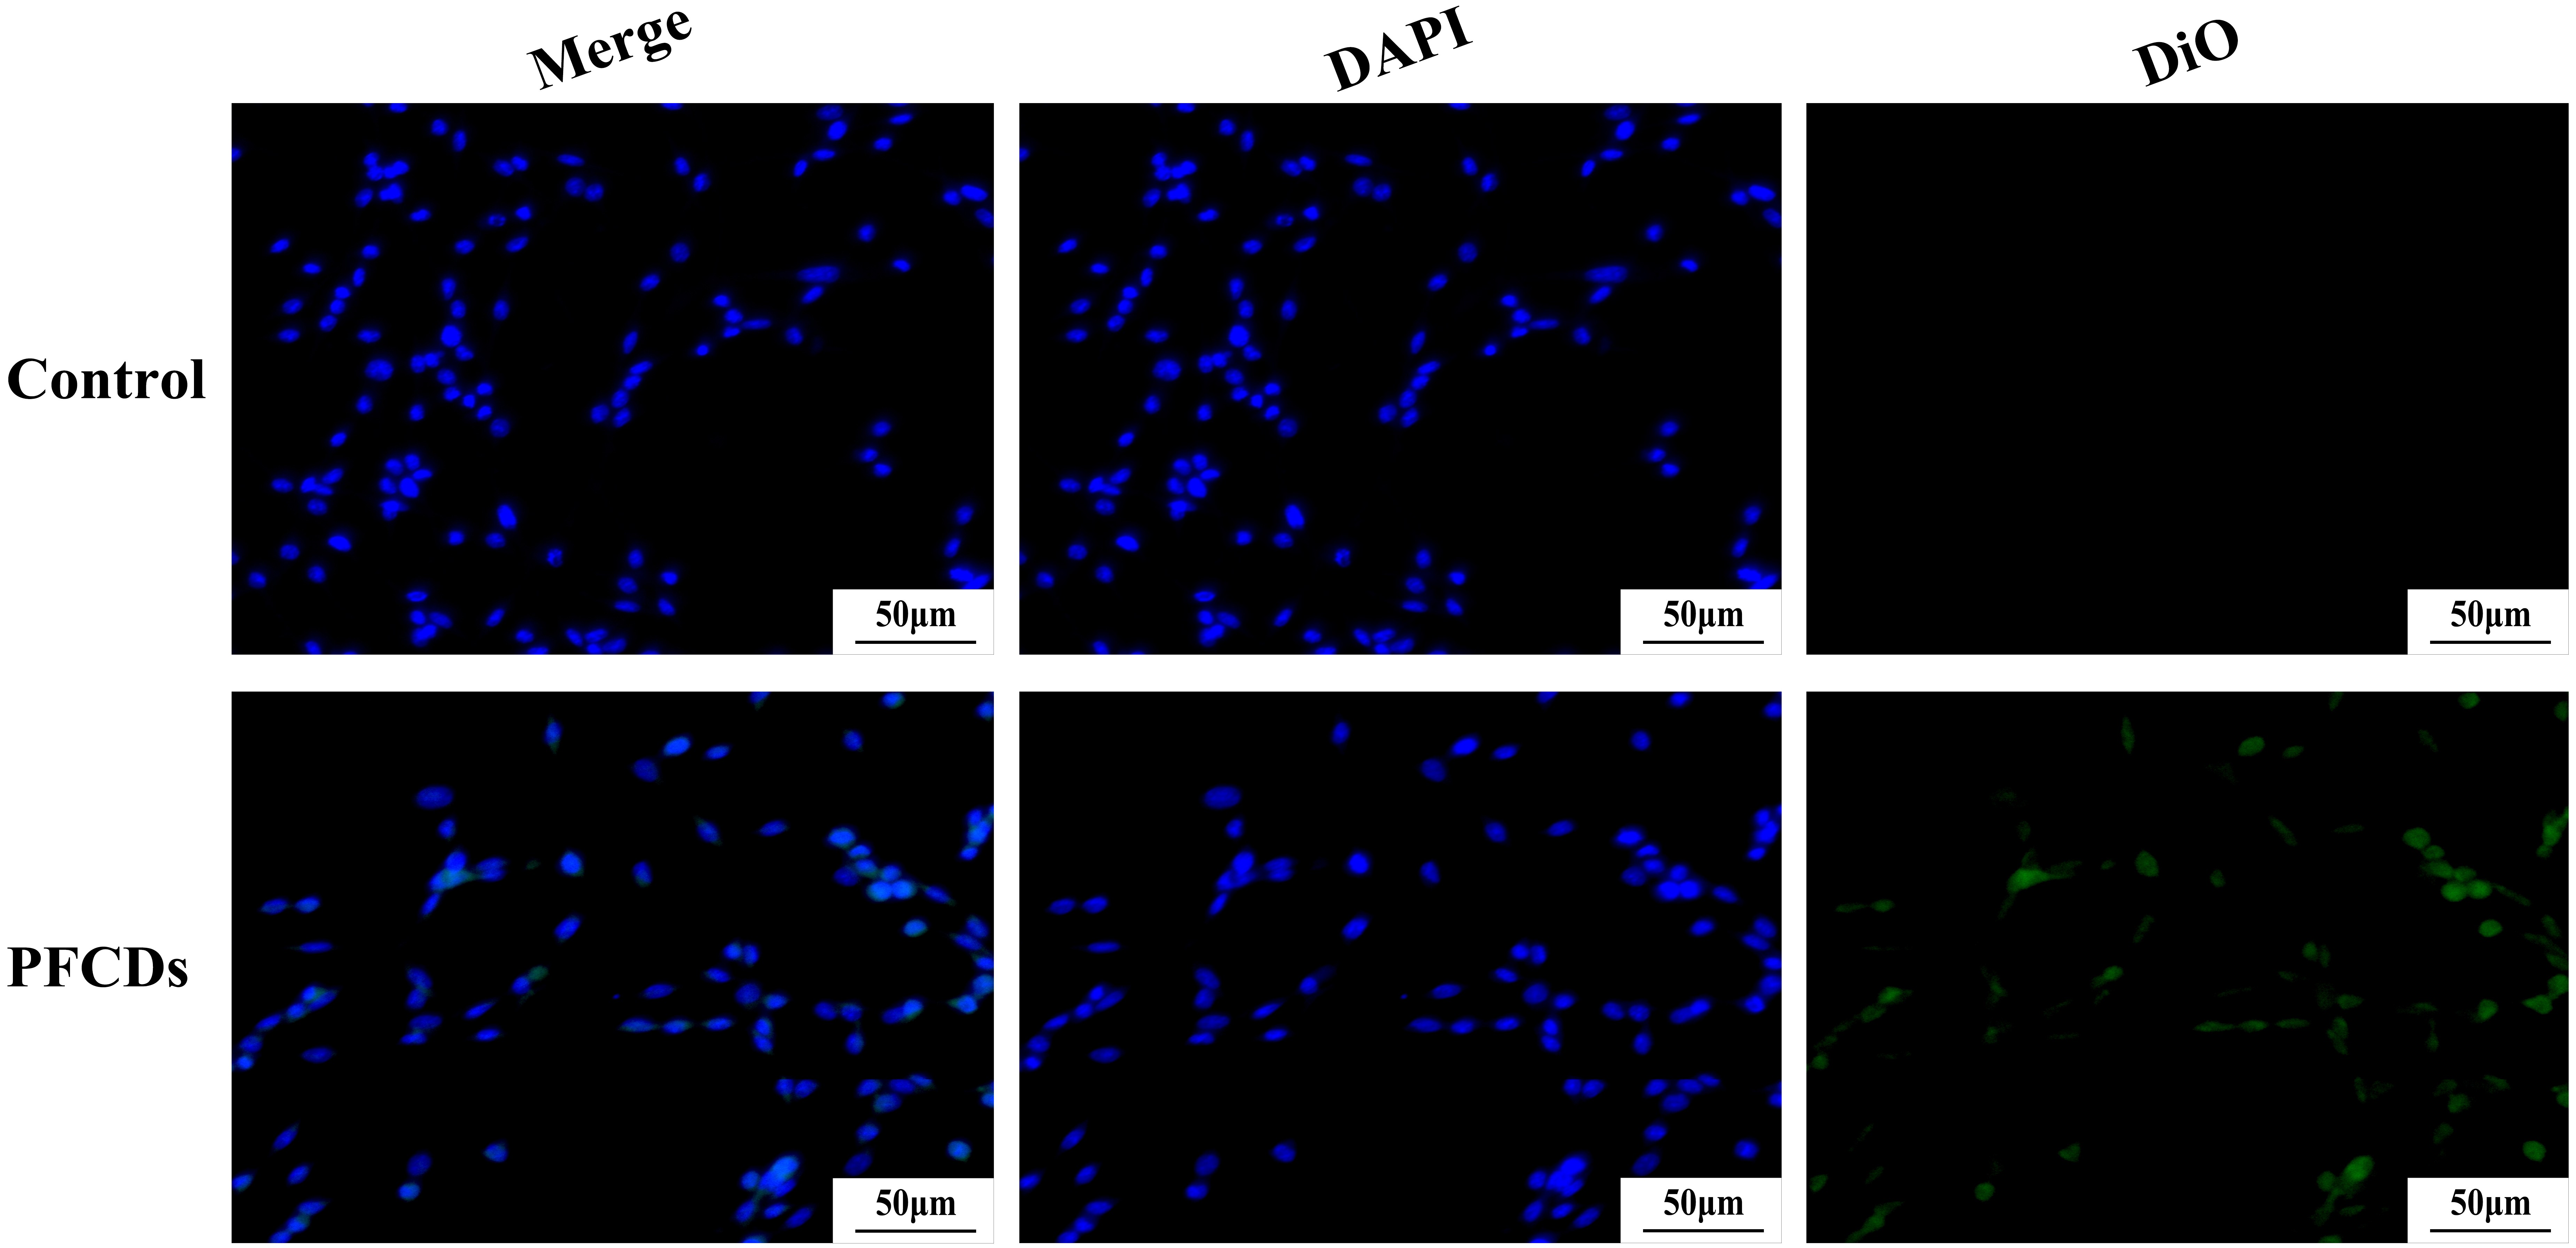


**Figure S2** Representative confocal microscopy images (DiO channel) showing the cellular uptake of PFCDs by PC12 cells. Nuclei were stained with DAPI (scale bar: 50 μm).


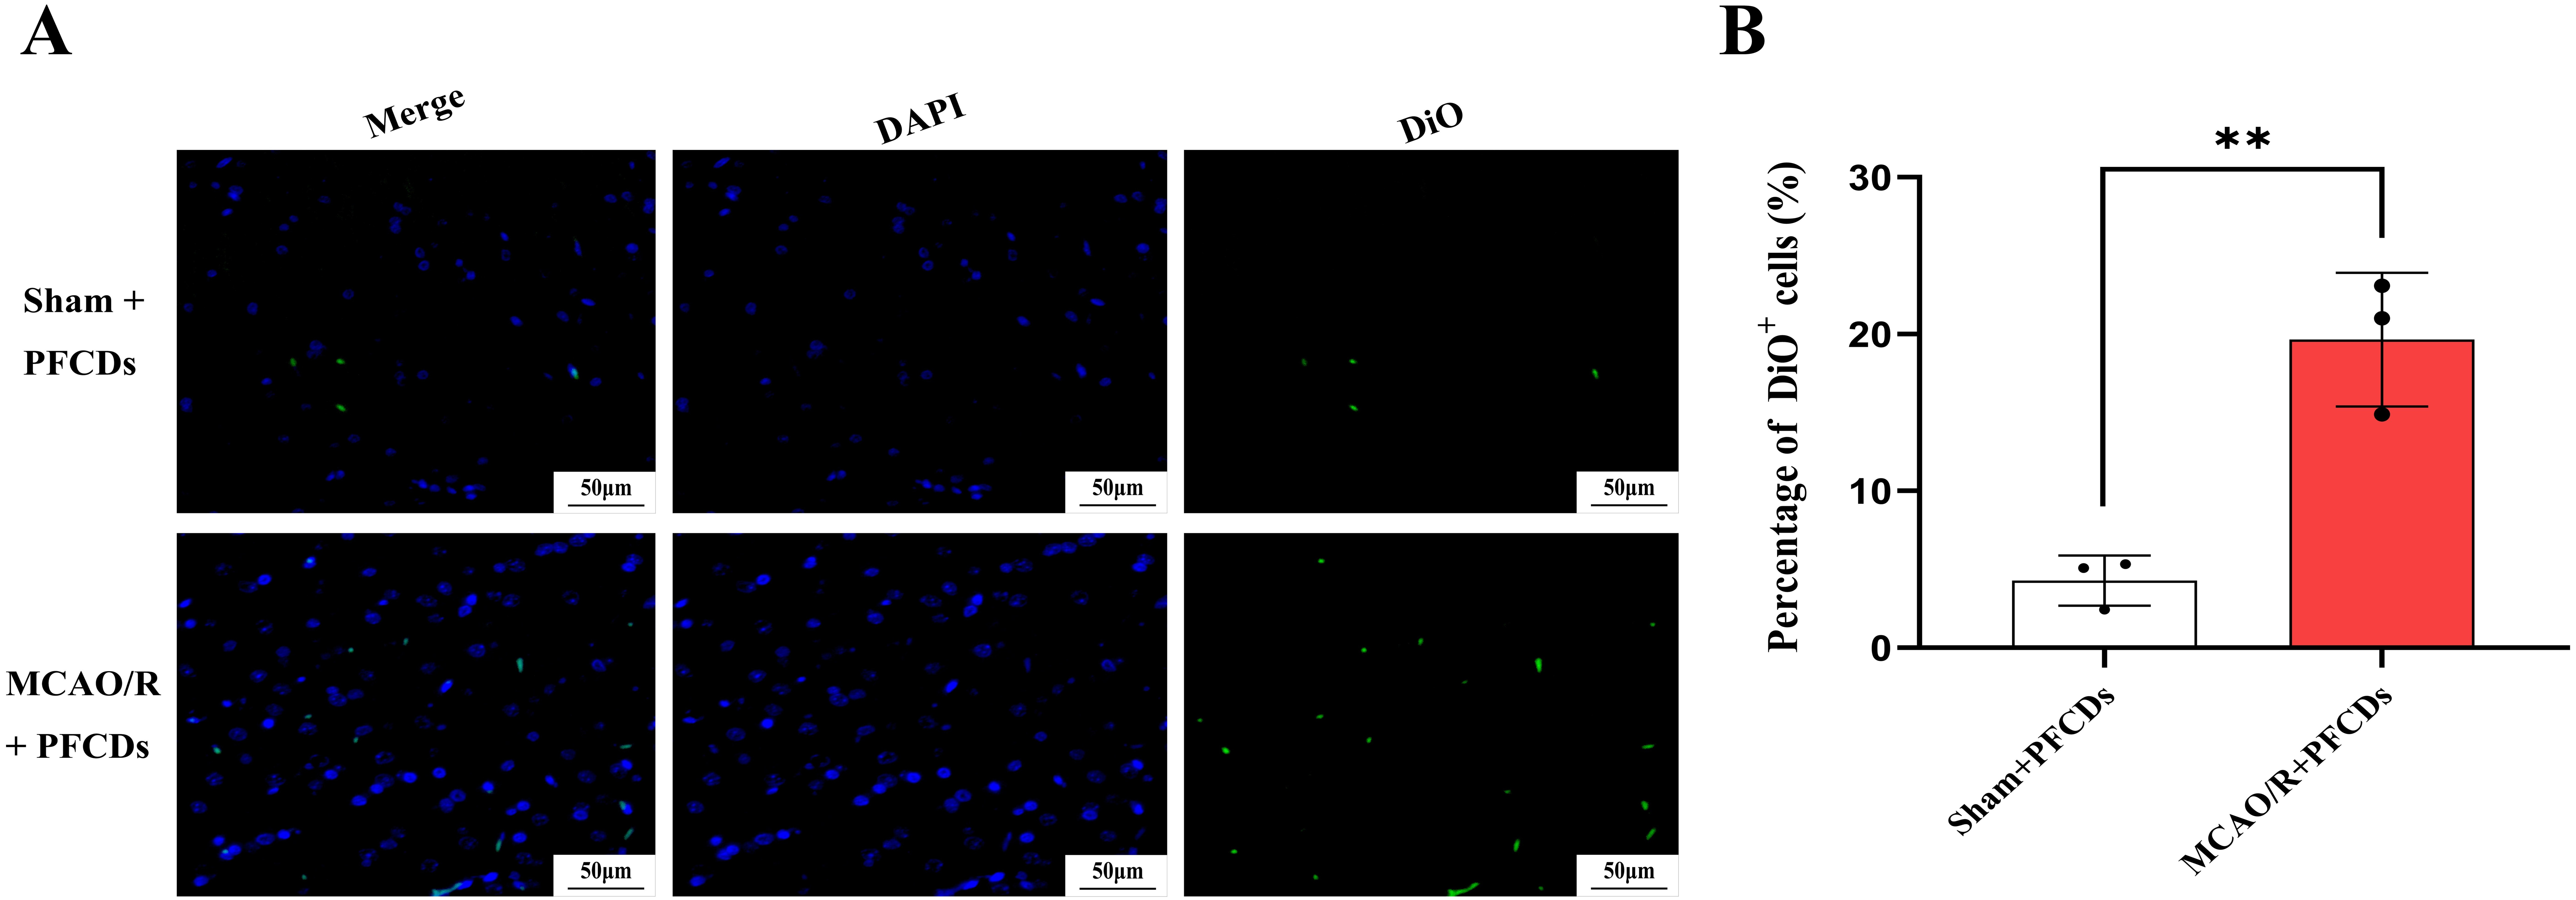


**Figure S3** (A) Representative confocal microscopy images (DiO channel) showing PFCD fluorescence in rat brain tissue across experimental groups. Nuclei were stained with DAPI (scale bar: 50 μm). (B) Percentage of DiO+ cells in rat brain tissue across experimental groups, expressed as a percentage of DAPI+ cells (mean ± SD, n=3). Statistical significance: **P < 0.01 vs. Sham + PFCDs group.
